# Supplementary material for: The effect of fluoride iontophoresis on seal ability of self-etch adhesive in human dentin in vitro
Source: Springer Nature journal article supplement (doi:10.1186/s12903-022-02146-w), 2022-04-02
Supplement: MOESM1 [file 20278380]

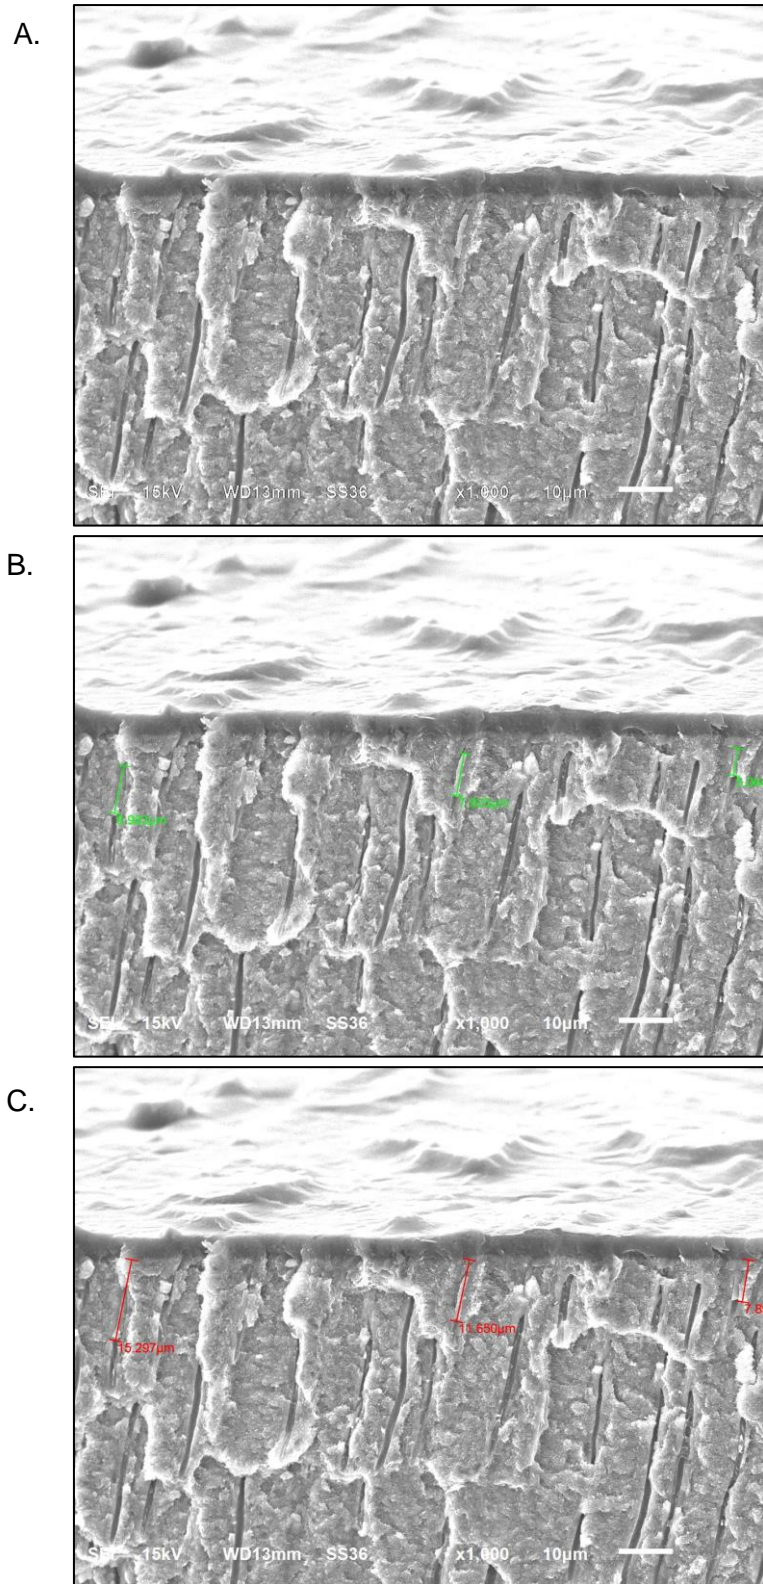

**Figure S1 (A–C)** Scanning electron micrographs of longitudinal views of intact dentin with fluoride iontophoresis and self-etch adhesive treatment (original magnification X1000), showing bundle precipitates with the size of 5-10 μm in dentinal tubules at the depth of 8-16 μm.
